# Supplementary material for: Inhibition of microglia overactivation restores neuronal survival in a mouse model of CDKL5 deficiency disorder
Source: PubMed Central journal article supplement (PMC8265075; doi:10.1186/s12974-021-02204-0), 2021-07-08
Supplement: 12974_2021_2204_MOESM1_ESM.pdf [file 12974_2021_2204_MOESM1_ESM.pdf]

| <b>Gene</b>                   |                | <b>Primer sequence (5'-3')</b> |
|-------------------------------|----------------|--------------------------------|
| <i>IL-1<math>\beta</math></i> | <i>Forward</i> | TGCCACCTTTTGACAGTGATG          |
|                               | <i>Reverse</i> | TGATGTGCTGCTGCGAGATT           |
| <i>IL-6</i>                   | <i>Forward</i> | CTCTGCAAGAGACTTCCATCCA         |
|                               | <i>Reverse</i> | GACAGGTCTGTTGGGAGTGG           |
| <i>TNF<math>\alpha</math></i> | <i>Forward</i> | TAGCCCACGTCGTAGCAAAC           |
|                               | <i>Reverse</i> | GCAGCCTTGTCCCTTGAAGA           |
| <i>CX3CR1</i>                 | <i>Forward</i> | TGCTTGACATTGGGGAGACTGGA        |
|                               | <i>Reverse</i> | AGGGAACGCTAAAGTCCTGGCTGA       |
| <i>AIF-1</i>                  | <i>Forward</i> | GTCCTTGAAGCGAATGCTGG           |
|                               | <i>Reverse</i> | CATTCTCAAGATGGCAGATC           |
| <i>mCdk15</i>                 | <i>Forward</i> | TGCAGACACAAGGAAACACATGA        |
|                               | <i>Reverse</i> | TTTCCTGCTTGAGAGTGC GAA         |
| <i>CD11b</i>                  | <i>Forward</i> | CCTTGTTCTCTTTGATGCAG           |
|                               | <i>Reverse</i> | GTGATGACA ACTAGGATCTT          |
| <i>NeuN</i>                   | <i>Forward</i> | ACACACACACTCCATACTGAGG         |
|                               | <i>Reverse</i> | GCTCTGGGCTCTCTGTTTGC           |

**Supplementary Table 1.** List of primers used for quantitative RT-PCR.

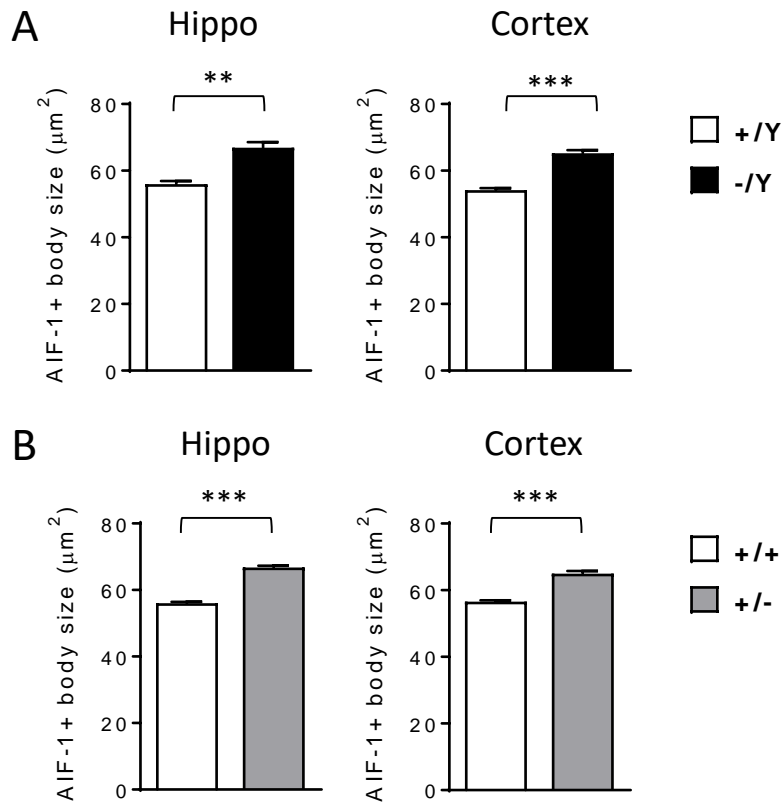

### Supplementary Figure 1

Mean AIF-1-cell body size of microglial cells in hippocampal (Hippo) and somatosensory cortex (Cortex) sections from 3-month-old male (+/Y n=4, -/Y n=4; A), and female (+/+ n=5, +/- n=6; B) *Cdkl5* KO mice. The results in A and B are presented as means  $\pm$  SEM. \*\* p<0.01; \*\*\*p<0.001 (two-tailed Student's t-test).

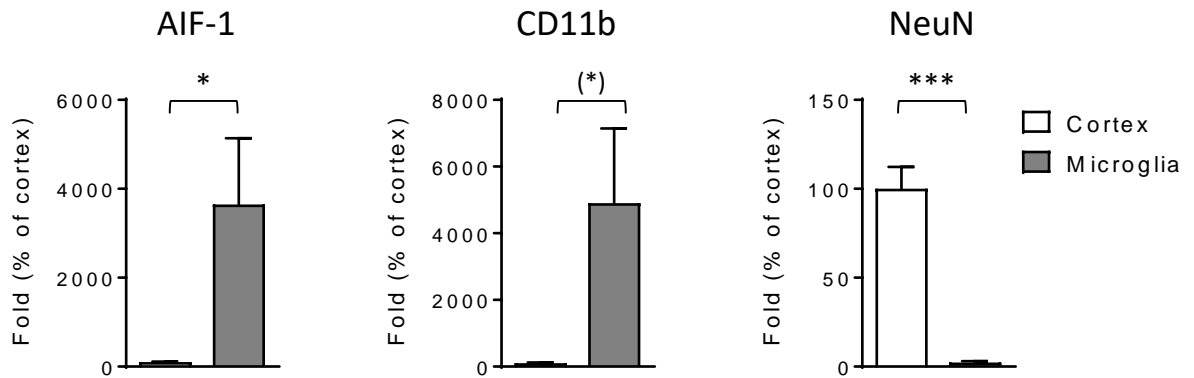

## Supplementary Figure 2

Real-time qPCR analysis of Allograft inflammatory factor 1 (AIF-1), CD11b, and NeuN gene expression in the cortex of 3-month-old *Cdk15*  $+/+$  mice (n=6) and microglial cells purified from 3-month-old *Cdk15*  $+/+$  mice (n=6). Data are given as a percentage of *Cdk15*  $+/+$  mice cortical expression. The results are presented as means  $\pm$  SEM. (\*)  $p=0.057$ ; \*  $p<0.05$ ; \*\*\* $p<0.001$  (two-tailed Student's t-test).

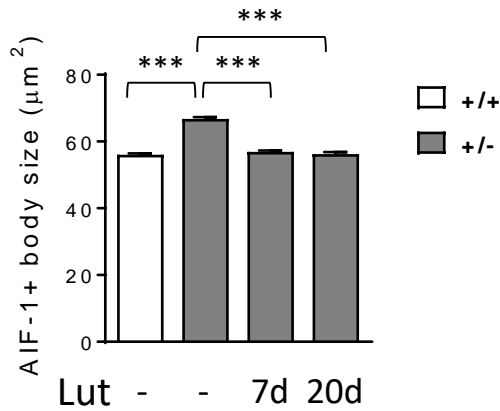

### Supplementary Figure 3

Mean AIF-1-cell body size of microglial cells in the hippocampus of 3-month-old *Cdk15* +/+ (n=5) and *Cdk15* +/- (n=6) mice, and *Cdk15* +/- mice daily treated with luteolin intraperitoneal injections (i.p. 10 mg/kg) for 7 (Lut 7d, n=4) or 20 days (Lut 20d, n=4). Values are represented as mean  $\pm$  SEM. \*\*\*p<0.001 (Fisher's LSD test after one-way ANOVA).

**A**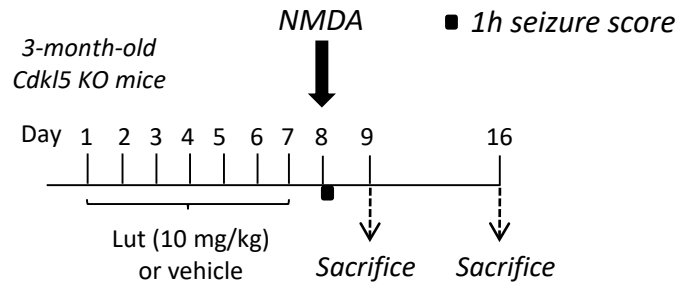**B**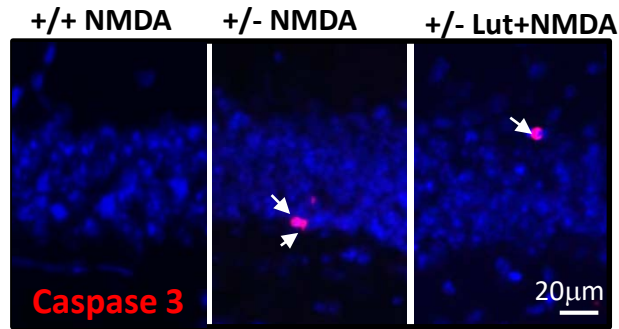**C**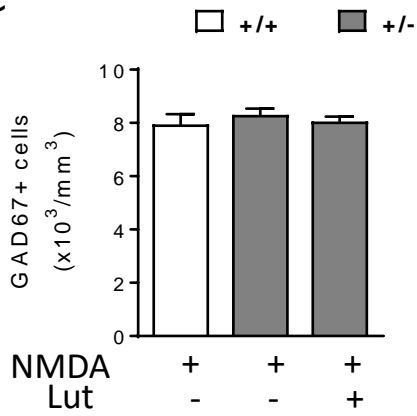**D**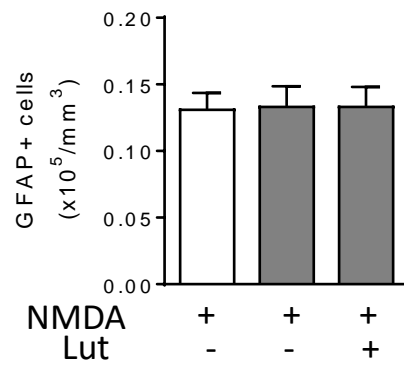

#### Supplementary Figure 4

**A:** Schematic view of *in vivo* treatments in 3-month-old *Cdkl5* KO female mice. Mice received a single intraperitoneal injection of NMDA (60 mg/kg) after 7 days of vehicle or luteolin treatment. Seizure grades were scored in a 60-minute observation period after NMDA injection (black square). Animals were sacrificed 1 day or 8 days after NMDA administration. **B:** Examples of cleaved caspase-3 positive cells (white arrows) in the hippocampus of a *Cdkl5* *+/+* and a *Cdkl5* *+/-* mouse treated with vehicle and NMDA, and in a *Cdkl5* *+/-* mouse pre-treated for 7 days with luteolin before NMDA injection. Mice were sacrificed 24 h after NMDA treatment. **C,D:** Quantification of GAD67 (C) and GFAP (D) positive cells in CA1 layer of hippocampal sections from mice treated as in A and sacrificed 8 days after NMDA administration. Values in C,D are represented as means  $\pm$  SEM. (Fisher's LSD test after one-way ANOVA).
