# Supplementary material for: Inhibition of microglia overactivation restores neuronal survival in a mouse model of CDKL5 deficiency disorder
Source: PubMed Central journal article supplement (PMC8265075; doi:10.1186/s12974-021-02204-0), 2021-07-08
Supplement: 12974_2021_2204_MOESM2_ESM.pdf [file 12974_2021_2204_MOESM2_ESM.pdf]

Supplementary information for reviewers

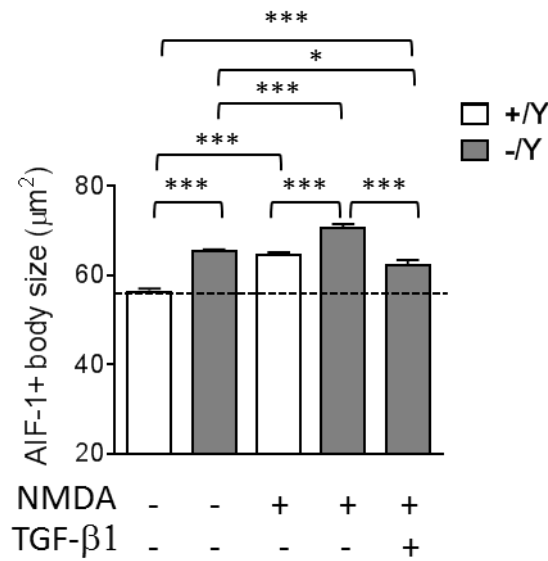

**Effect of TGF-β1 treatment on NMDA-induced microglia activation in the hippocampus of Cdk15 KO mice.**

10–12-week-old *Cdk15* +/Y and *Cdk15* -/Y mice were treated with vehicle only (n=2) or with an intraperitoneal injection of NMDA (60 mg/kg; n=4). To assess the effect of TGF-β1 treatment on NMDA-induced microglia activation, *Cdk15* -/Y (n=5) mice were intraventricularly injected with TGF-β1 (50 ng) 1 h after NMDA administration. Mice were sacrificed 24 h after NMDA treatment (Fuchs et al. 2019). The histogram shows the mean AIF-1-cell body size of microglial cells in the hippocampus of *Cdk15* mice treated as described above. The results are presented as means ± SEM. \* p<0.05; \*\*\*p<0.001 (Fisher's LSD test after one-way ANOVA).
